# Supplementary material for: Fabrication and properties of a high-performance chlorine doped graphene quantum dot based photovoltaic detector
Source: Royal Society of Chemistry journal article supplement (doi:10.1039/c5ra02358k), 2015-01-01
Supplement: c5ra02358k1.pdf [file c5ra02358k1.pdf]

*Electronic Supplementary Information*

**Fabrication and properties of high-performance chlorine doped graphene quantum dots based photovoltaic detector**

Jianhong Zhao,<sup>a</sup> Libin Tang,<sup>\*b</sup> Jinzhong Xiang,<sup>\*a</sup> Rongbin Ji,<sup>\*b</sup> Yanbo Hu,<sup>b</sup> Jun Yuan,<sup>b</sup> Jun Zhao,<sup>b</sup> Yunjian Tai,<sup>b</sup> and Yuhua Cai<sup>a</sup>

<sup>a</sup> School of Physical Science and Technology, Yunnan University, Kunming, 650091, P. R. China.

<sup>b</sup> Kunming Institute of Physics, Kunming, 650223, P. R. China.

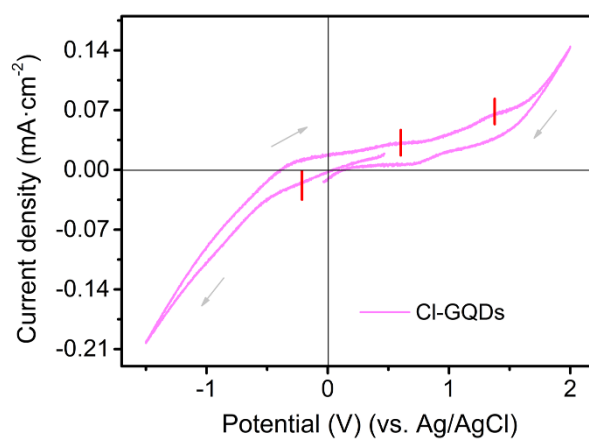

Figure S1. The cyclic voltammety cuve of Cl-GQDs dispersed in N-methylpyrrolidone (NMP) using  $\text{Na}_2\text{SO}_4$  as electrolyte.

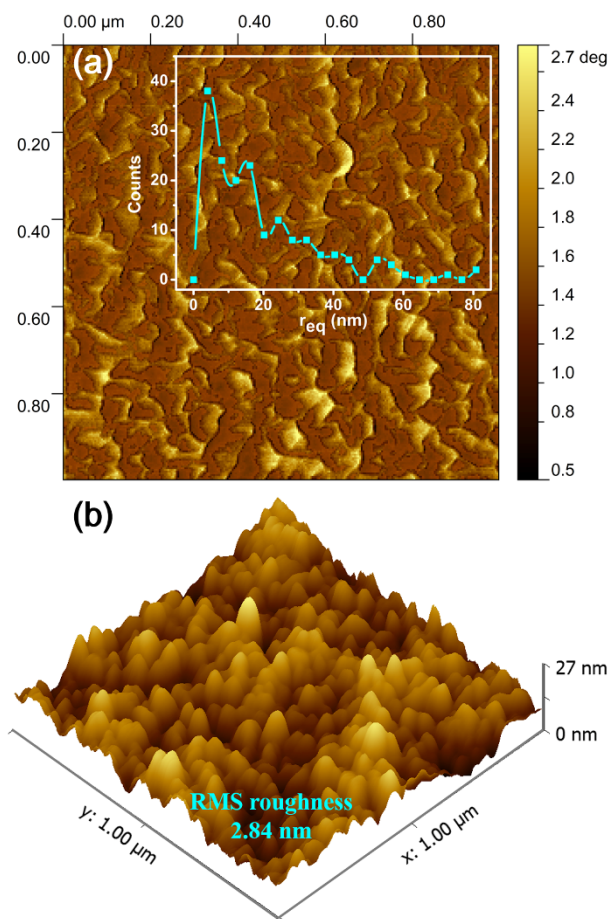

Figure S2. (a) AFM phase image of Al film, inset: size distribution of particles in Al film. (b) The AFM topographic image of Al film with the RMS roughness of 2.84 nm.

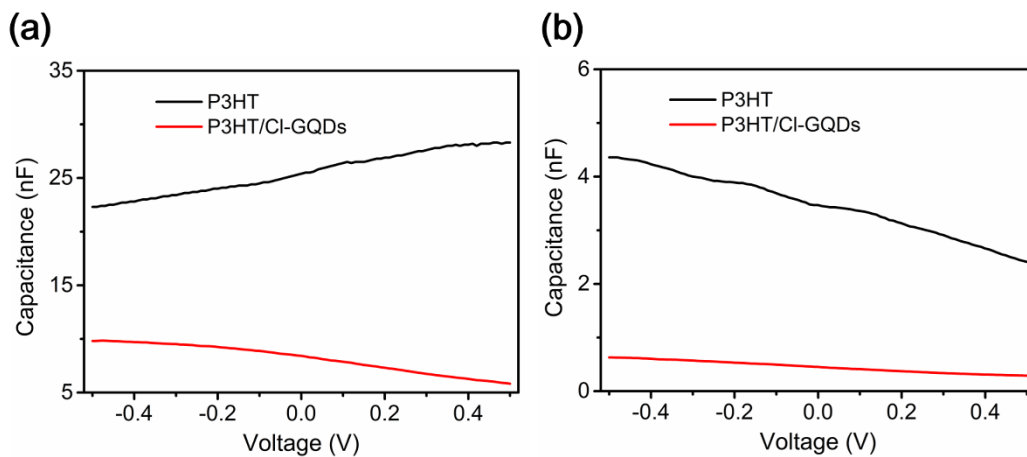

Figure S3. The  $C$ - $V$  curves for P3HT and P3HT/CI-GQDs devices under illumination at various frequencies, (a) 20 kHz, (b) 100 kHz.

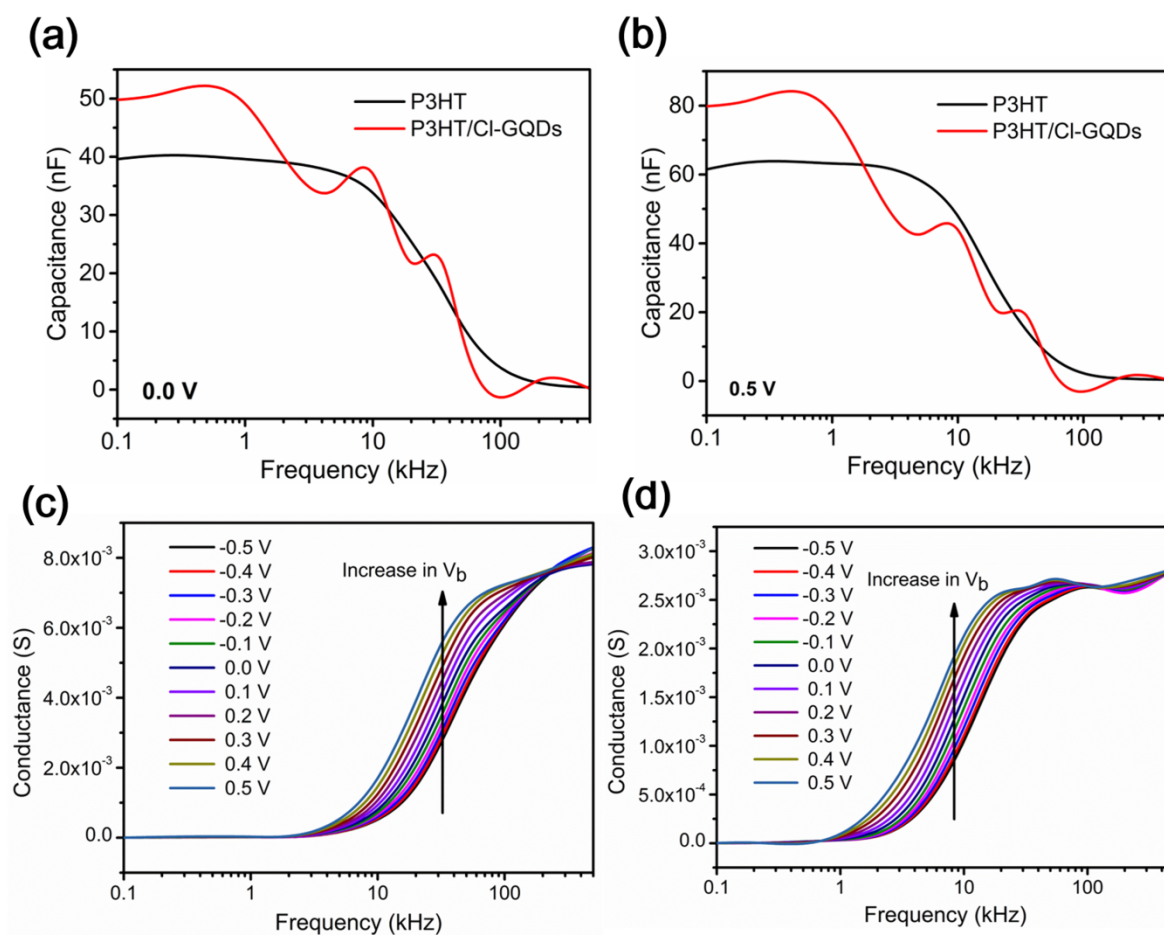

Figure S4. The  $C$ - $f$  characteristics of the P3HT (a) and P3HT/CI-GQDs (b) devices measured at different voltages. The  $G$ - $f$  characteristics of the P3HT (c) and P3HT/CI-GQDs (d) devices measured at different voltages ranging from -0.5 to 0.5 V with a voltage step of 0.1 V.
